# Supplementary material for: Advanced combinational microfluidic multiplexer using multiple levels of control pressures
Source: Royal Society of Chemistry journal article supplement (doi:10.1039/c3lc50513h), 2013-01-01
Supplement: c3lc50513h.pdf [file c3lc50513h.pdf]

## Supplementary Information

### I. 4 control lines

*Case 1) all 4 control lines are 50 kPa*

All four control lines are selected as  $P_{50kPa}$ . The number of control pressure combination is  ${}_4C_4 = 1$ . The unique combination in this case is (C<sub>1</sub>:50kPa, C<sub>2</sub>:50kPa, C<sub>3</sub>:50kPa, C<sub>4</sub>:50kPa).

*Case 2) 1 line is 100 kPa and 2 control lines are 50kPa*

Due to the dependency of control pressure as we explained above,  $P_{100kPa}$  in a control line requires the choice of  $P_{low}$  in the same control line. Once we choose one among four control lines for  $P_{100kPa}$ ,  $P_{50kPa}$  is automatically selected and we lose one option. So cases are to choose two control lines among the four control lines for  $P_{50kPa}$  ( ${}_4C_2$ ) and choose one control lines among the remaining two ( ${}_2C_1$ ). Therefore, overall number of pressure combinations is  ${}_4C_2 \times {}_2C_1 = 12$ . The pressure combinations are (C<sub>1</sub>:100kPa, C<sub>1</sub>:50kPa, C<sub>2</sub>:50kPa, C<sub>3</sub>:50kPa), (C<sub>1</sub>:100kPa, C<sub>1</sub>:50kPa, C<sub>2</sub>:50kPa, C<sub>4</sub>:50kPa), (C<sub>1</sub>:100kPa, C<sub>1</sub>:50kPa, C<sub>3</sub>:50kPa, C<sub>4</sub>:50kPa), (C<sub>2</sub>:100kPa, C<sub>2</sub>:50kPa, C<sub>1</sub>:50kPa, C<sub>3</sub>:50kPa), (C<sub>2</sub>:100kPa, C<sub>2</sub>:50kPa, C<sub>1</sub>:50kPa, C<sub>4</sub>:50kPa), (C<sub>2</sub>:100kPa, C<sub>2</sub>:50kPa, C<sub>3</sub>:50kPa, C<sub>4</sub>:50kPa), (C<sub>3</sub>:100kPa, C<sub>3</sub>:50kPa, C<sub>1</sub>:50kPa, C<sub>2</sub>:50kPa), (C<sub>3</sub>:100kPa, C<sub>3</sub>:50kPa, C<sub>1</sub>:50kPa, C<sub>4</sub>:50kPa), (C<sub>3</sub>:100kPa, C<sub>3</sub>:50kPa, C<sub>2</sub>:50kPa, C<sub>4</sub>:50kPa), (C<sub>4</sub>:100kPa, C<sub>4</sub>:50kPa, C<sub>1</sub>:50kPa, C<sub>2</sub>:50kPa), (C<sub>4</sub>:100kPa, C<sub>4</sub>:50kPa, C<sub>1</sub>:50kPa, C<sub>3</sub>:50kPa), (C<sub>4</sub>:100kPa, C<sub>4</sub>:50kPa, C<sub>2</sub>:50kPa, C<sub>3</sub>:50kPa).

*Case 4) 2 line are 100 kPa*

In this case, we need two control lines with  $P_{100kPa}$ . Each  $P_{100kPa}$  require  $P_{50kPa}$  in the same control line and no other options are left. The pressure combination is to choose two among four control lines,  ${}_4C_2 = 6$ . The detailed pressure combinations are (C<sub>1</sub>:100kPa, C<sub>1</sub>:50kPa, C<sub>2</sub>:100kPa, C<sub>2</sub>:50kPa), (C<sub>1</sub>:100kPa, C<sub>1</sub>:50kPa, C<sub>3</sub>:100kPa, C<sub>3</sub>:50kPa), (C<sub>1</sub>:100kPa, C<sub>1</sub>:50kPa, C<sub>4</sub>:100kPa, C<sub>4</sub>:50kPa), (C<sub>2</sub>:100kPa, C<sub>2</sub>:50kPa, C<sub>3</sub>:100kPa, C<sub>3</sub>:50kPa), (C<sub>2</sub>:100kPa, C<sub>2</sub>:50kPa, C<sub>4</sub>:100kPa, C<sub>4</sub>:50kPa), (C<sub>3</sub>:100kPa, C<sub>3</sub>:50kPa, C<sub>4</sub>:100kPa, C<sub>4</sub>:50kPa).

$$F_{Total} = 1 + 12 + 6 = 19$$

## II. 6 control lines

In case for 6 control lines ( $n=6, m=2$ ), equation 3 and 4 are,

$$a_1 + 2a_2 = 6, \quad a_1 + a_2 \leq 6$$

$(a_1, a_2)$  satisfying these equations are  $(a_1=6, a_2=0)$ ,  $(a_1=4, a_2=1)$ ,  $(a_1=2, a_2=2)$ ,  $(a_1=0, a_2=3)$ .

In each case, the number of controllable fluidic channels is,

Case 1) All 6 control lines are 50kPa,  $F_{a_1=6, a_2=0} = {}_6C_6 = 1$

Case 2) 1 control line is 100kPa and 4 control lines are 50kPa,  $F_{a_1=4, a_2=1} = {}_6C_4 \cdot {}_2C_1 = 30$

Case 3) 2 control lines are 100kPa and 2 control lines are 50kPa,  $F_{a_1=2, a_2=2} = {}_6C_2 \cdot {}_4C_2 = 90$

Case 4) 3 control lines are 100kPa,  $F_{a_1=0, a_2=3} = {}_6C_3 = 20$

$$F_{Total} = 1 + 30 + 90 + 20 = 141$$

## III. 8 control lines

In case for 8 control lines ( $n=8, m=2$ ), equation 3 and 4 are,

$$a_1 + 2a_2 = 8, \quad a_1 + a_2 \leq 8$$

$(a_1, a_2)$  cases satisfying these equations are  $(a_1=8, a_2=0)$ ,  $(a_1=6, a_2=1)$ ,  $(a_1=4, a_2=2)$ ,  $(a_1=2, a_2=3)$ ,  $(a_1=0, a_2=4)$ . In each case, the number of controllable fluidic channels is,

Case 1) All 8 control lines are 50 kPa,  $F_{a_1=8, a_2=0} = {}_8C_8 = 1$

Case 2) 1 control line is 100kPa and 6 control lines are 50kPa,  $F_{a_1=6, a_2=1} = {}_8C_6 \cdot {}_2C_1 = 56$

Case 3) 2 control lines are 100kPa and 4 control lines are 50kPa,  $F_{a_1=4, a_2=2} = {}_8C_4 \cdot {}_4C_2 = 420$

Case 4) 3 control lines are 100kPa and 2 control lines are 50kPa,  $F_{a_1=2, a_2=3} = {}_8C_2 \cdot {}_6C_3 = 560$

Case 5) 4 control lines are 100kPa,  $F_{a_1=0, a_2=4} = {}_8C_4 = 70$

$$F_{Total} = 1 + 56 + 420 + 560 + 70 = 1,107$$

#### IV. 10 control lines

In case for 10 control line( $n=10, m=2$ ), equation 3 and 4 are,

$$a_1 + 2a_2 = 10, \quad a_1 + a_2 \leq 10$$

$(a_1, a_2)$  cases satisfying these equations are  $(a_1=10, a_2=0)$ ,  $(a_1=8, a_2=1)$ ,  $(a_1=6, a_2=2)$ ,  $(a_1=4, a_2=3)$ ,  $(a_1=2, a_2=4)$ ,  $(a_1=0, a_2=5)$ . In each case, the number of controllable fluidic channels is,

Case 1) All 10 control lines are 50kPa,  $F_{a_1=10, a_2=0} = {}_{10}C_{10} = 1$

Case 2) 1 control line is 100kPa and 8 control lines are 50kPa,  $F_{a_1=8, a_2=1} = {}_{10}C_8 \cdot {}_2C_1 = 90$

Case 3) 2 control lines are 100kPa and 6 control lines are 50kPa,  $F_{a_1=6, a_2=2} = {}_{10}C_6 \cdot {}_4C_2 = 1260$

Case 4) 3 control lines are 100kPa and 4 control lines are 50kPa,  $F_{a_1=4, a_2=3} = {}_{10}C_4 \cdot {}_6C_3 = 4200$

Case 5) 4 control lines are 100kPa and 2 control lines are 50kPa,  $F_{a_1=2, a_2=4} = {}_{10}C_2 \cdot {}_8C_4 = 3150$

Case 6) 5 control lines are 100kPa,  $F_{a_1=0, a_2=5} = {}_{10}C_5 = 252$

$$F_{Total} = 1 + 90 + 1260 + 4200 + 3150 + 252 = 8,953$$
